# Supplementary material
Source: PubMed Central journal article supplement (PMC2963664)

Figure S1

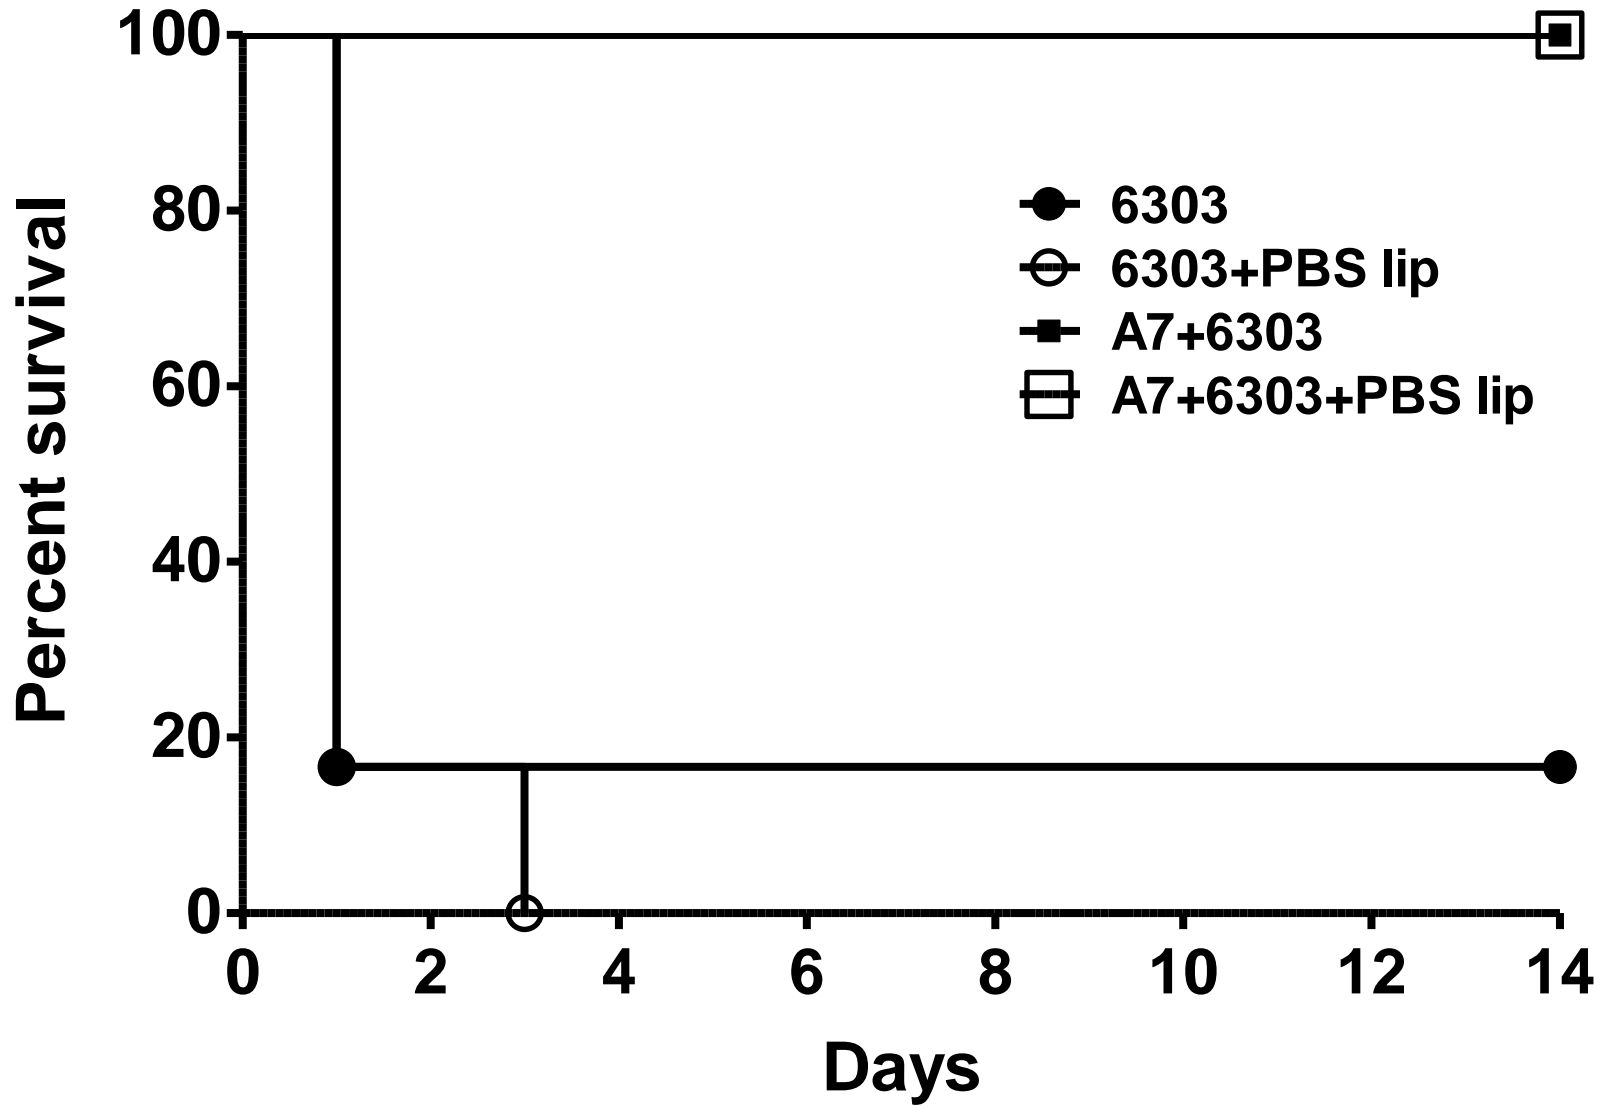

Supplement: NIHMS231404-supplement-01.pdf [file NIHMS231404-supplement-01.pdf]
